# Supplementary material for: Genetically diverse mouse platform to xenograft cancer cells
Source: PubMed Central journal article supplement (PMC9459392; doi:10.1242/dmm.049457), 2022-08-29
Supplement: dmm-15-049457-s1.pdf [file dmm-15-049457-s1.pdf]

**A**

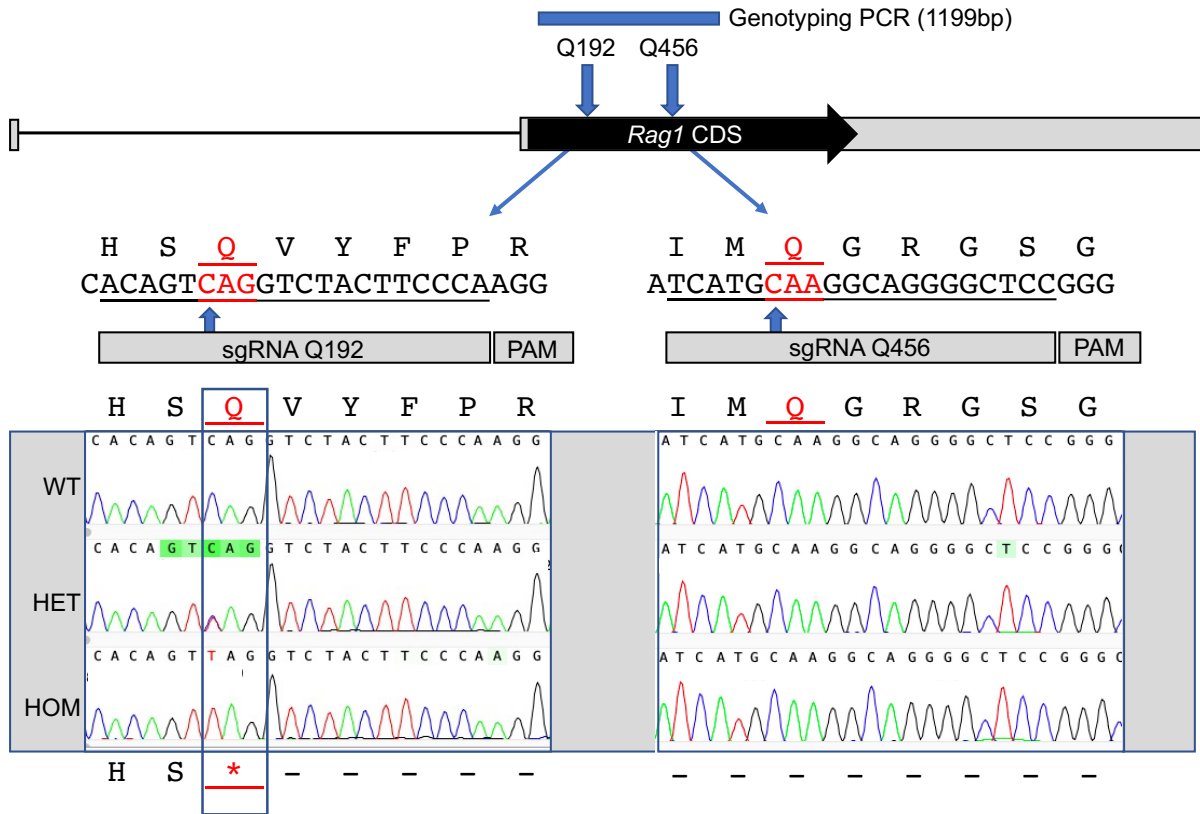

**B**

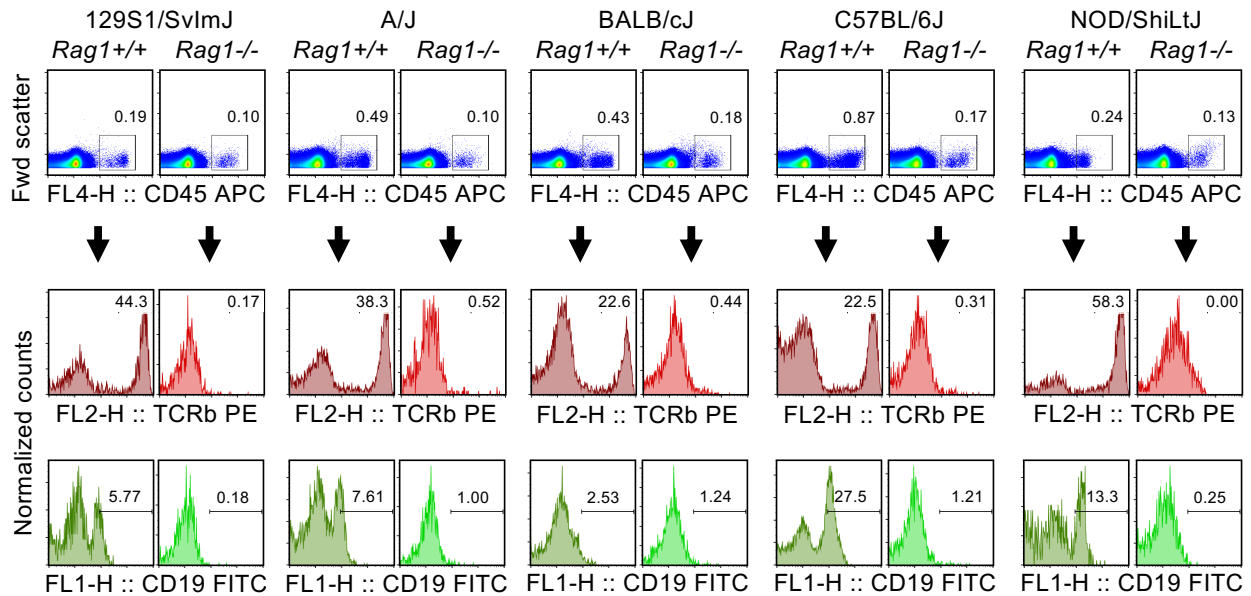

**Fig. S1. Generation and validation of the *Rag1*<sup>-/-</sup> knock out strains.** (A) Schematic of the method used to generate the *Rag1*<sup>-/-</sup> knock out on all the strains except for BAR, B6R, and NR, which were commercially available. (B) Flow Cytometry gating strategy of the blood to validate loss of B- and T-lymphocytes. Flow cytometry example of the CD45 population (all white blood cells) from *Rag1*<sup>+/+</sup> and *Rag1*<sup>-/-</sup> knock out from different strains gated on TCRb (T-lymphocytes) and CD19 (B- lymphocytes) showing complete nullizygoty of the adaptive immune system in the *Rag1*<sup>-/-</sup> strains.

**A**

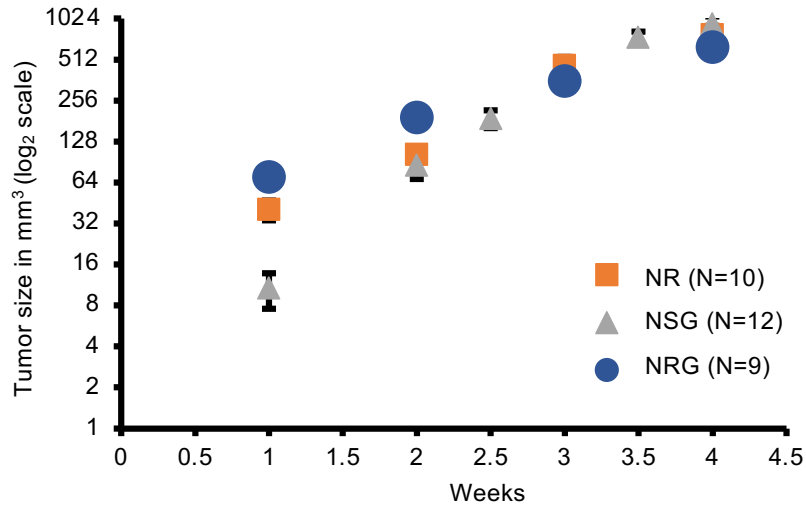

**B**

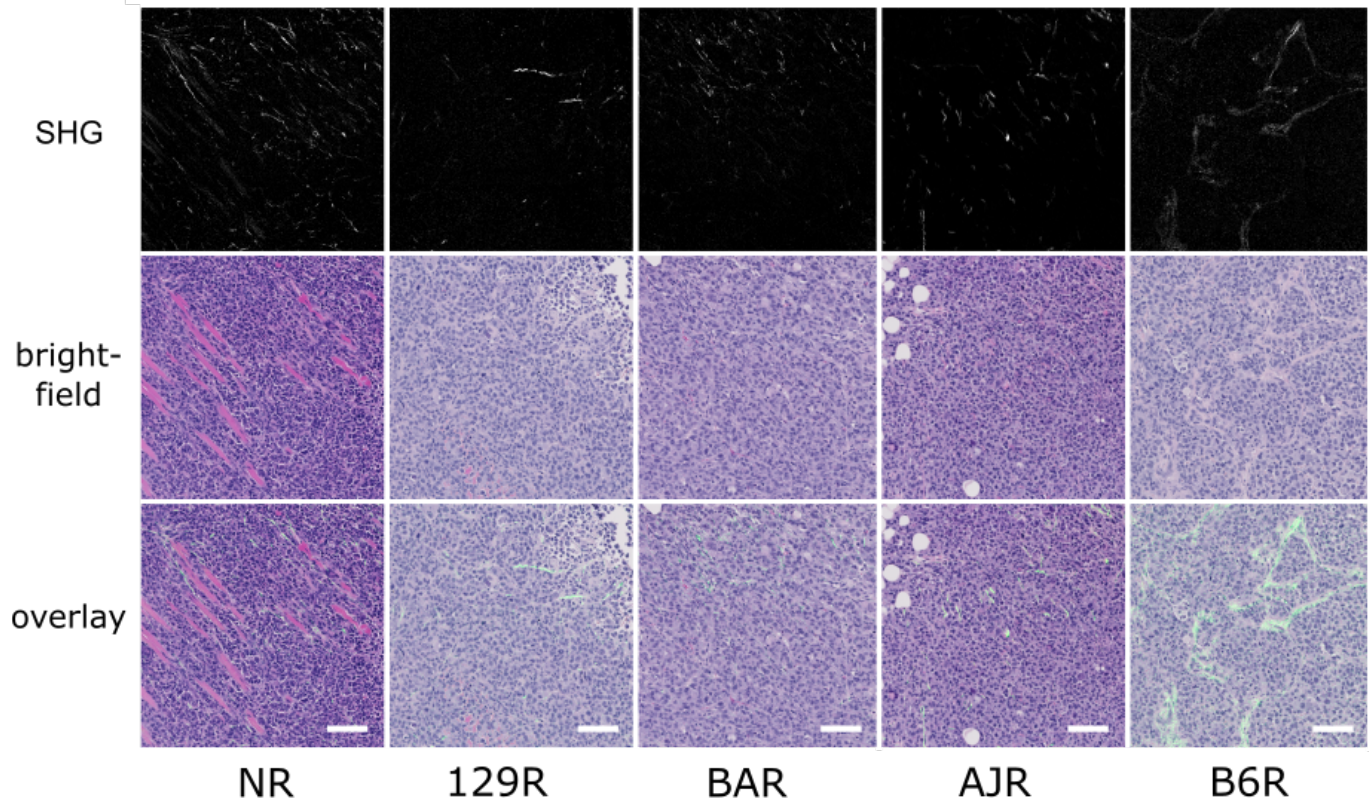

**Fig. S2. Growth curves of NR, NRG and NSG and collagen staining.** (A) Graph showing average growth with standard errors. Data is pooled from 3 experiments. (B) SHG collagen signal (top panels) showing the original, 8-bit signal collected by the 2P-M instrument setup. Center panels show brightfield images generated via pathology slide scanning instrument. The bottom panels show the overlay of SHG images, with a false-color representation (green) for better visibility on top of the corresponding area of the histo-pathology image. Scalebar100 $\mu$ m.



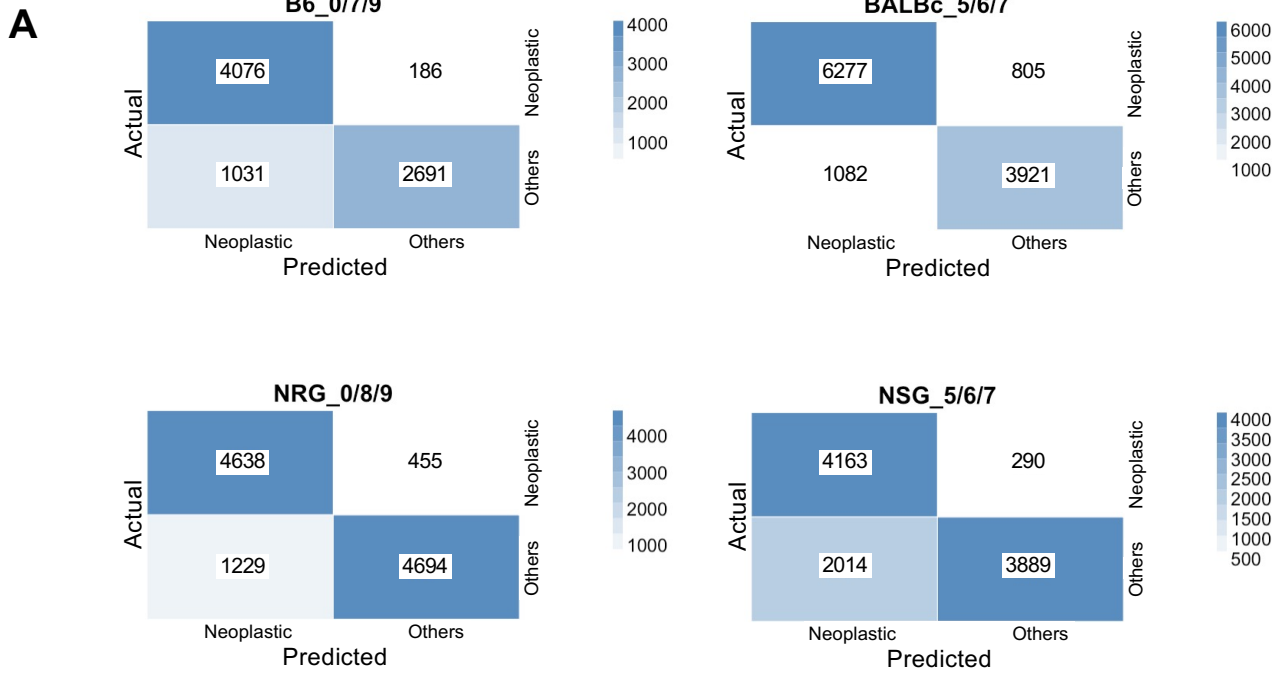

**B**

| Neoplastic vs Others | B6R (n=5479) | BAR (n=8969) | NRG (n=6777) | NSG (n=6757) |
|----------------------|--------------|--------------|--------------|--------------|
| Accuracy             | 0.847        | 0.843        | 0.847        | 0.777        |
| Precision            | 0.798        | 0.852        | 0.790        | 0.673        |
| Recall               | 0.956        | 0.886        | 0.910        | 0.934        |
| F1-score             | 0.870        | 0.869        | 0.846        | 0.783        |

**Fig. S3. Validation of HoVer-Net classifications using B6R, BAR, NRG and NSG strains.** (A) Confusion matrices of prediction of neoplastic nuclei by HoVer-Net based on selected tiles from three samples per strain. (B) Accuracy, precision, recall and F1-score for prediction of neoplastic nuclei for each strain.

**A**

MDA\_129\_R\_61 :  
Segmentation overlay  
2048 pixels [23212,56448]

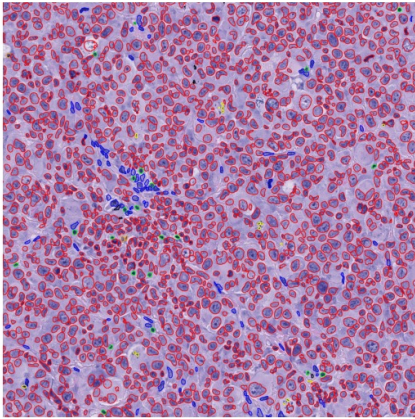

MDA\_AJ\_R\_64 :  
Segmentation overlay  
2048 pixels [15475,11097]

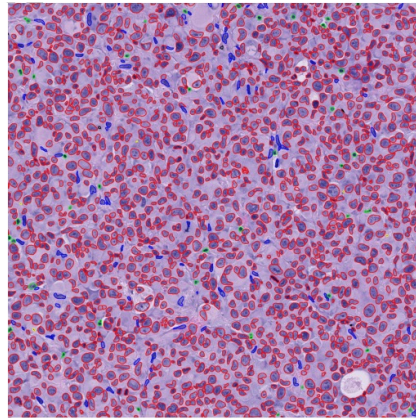

MDA\_Balb\_C\_R\_3 :  
Segmentation overlay  
2048 pixels [22203,54118]

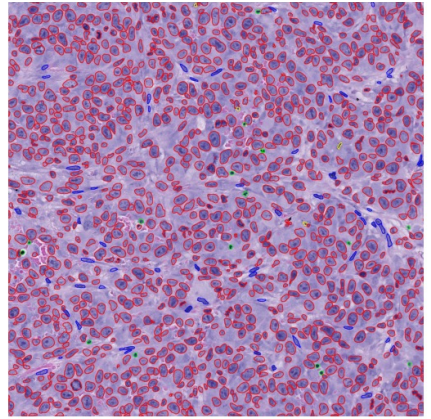

MDA\_NR\_22 :  
Segmentation overlay  
2048 pixels [39680,35328]

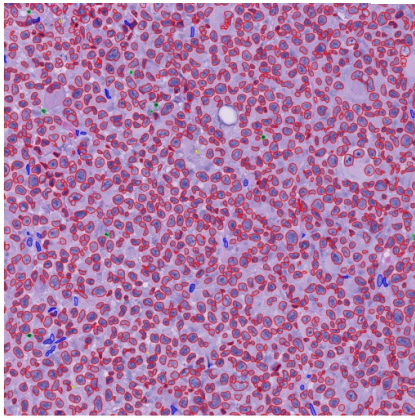

MDA\_B6\_R\_1 :  
Segmentation overlay  
2048 pixels [30950,45516]

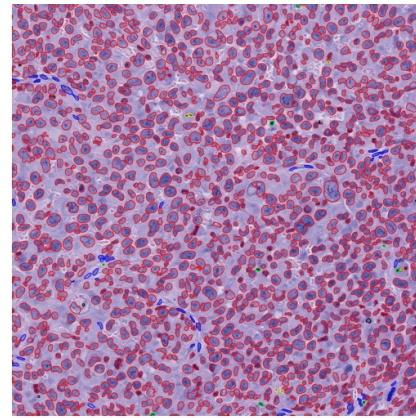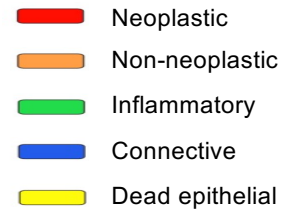

**B Tumor nuclei count per 1024 pixels tile**

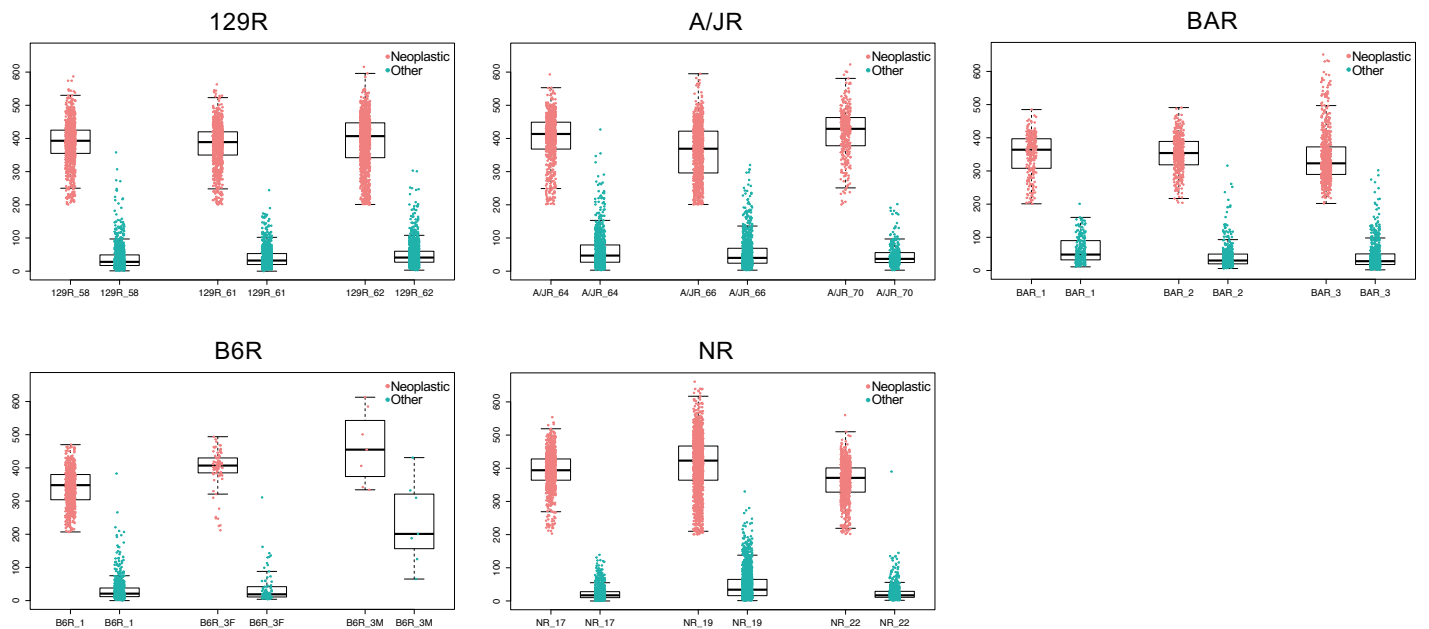

**Fig. S4. Examples of HoVer-Net segmentation and classification.** (A) The nuclei segmentations and classifications are overlaid on 2048 pixel x 2048 pixel regions representative of the H&E images for each strain.(B) Distribution of neoplastic and other nuclei density for each whole slide image.

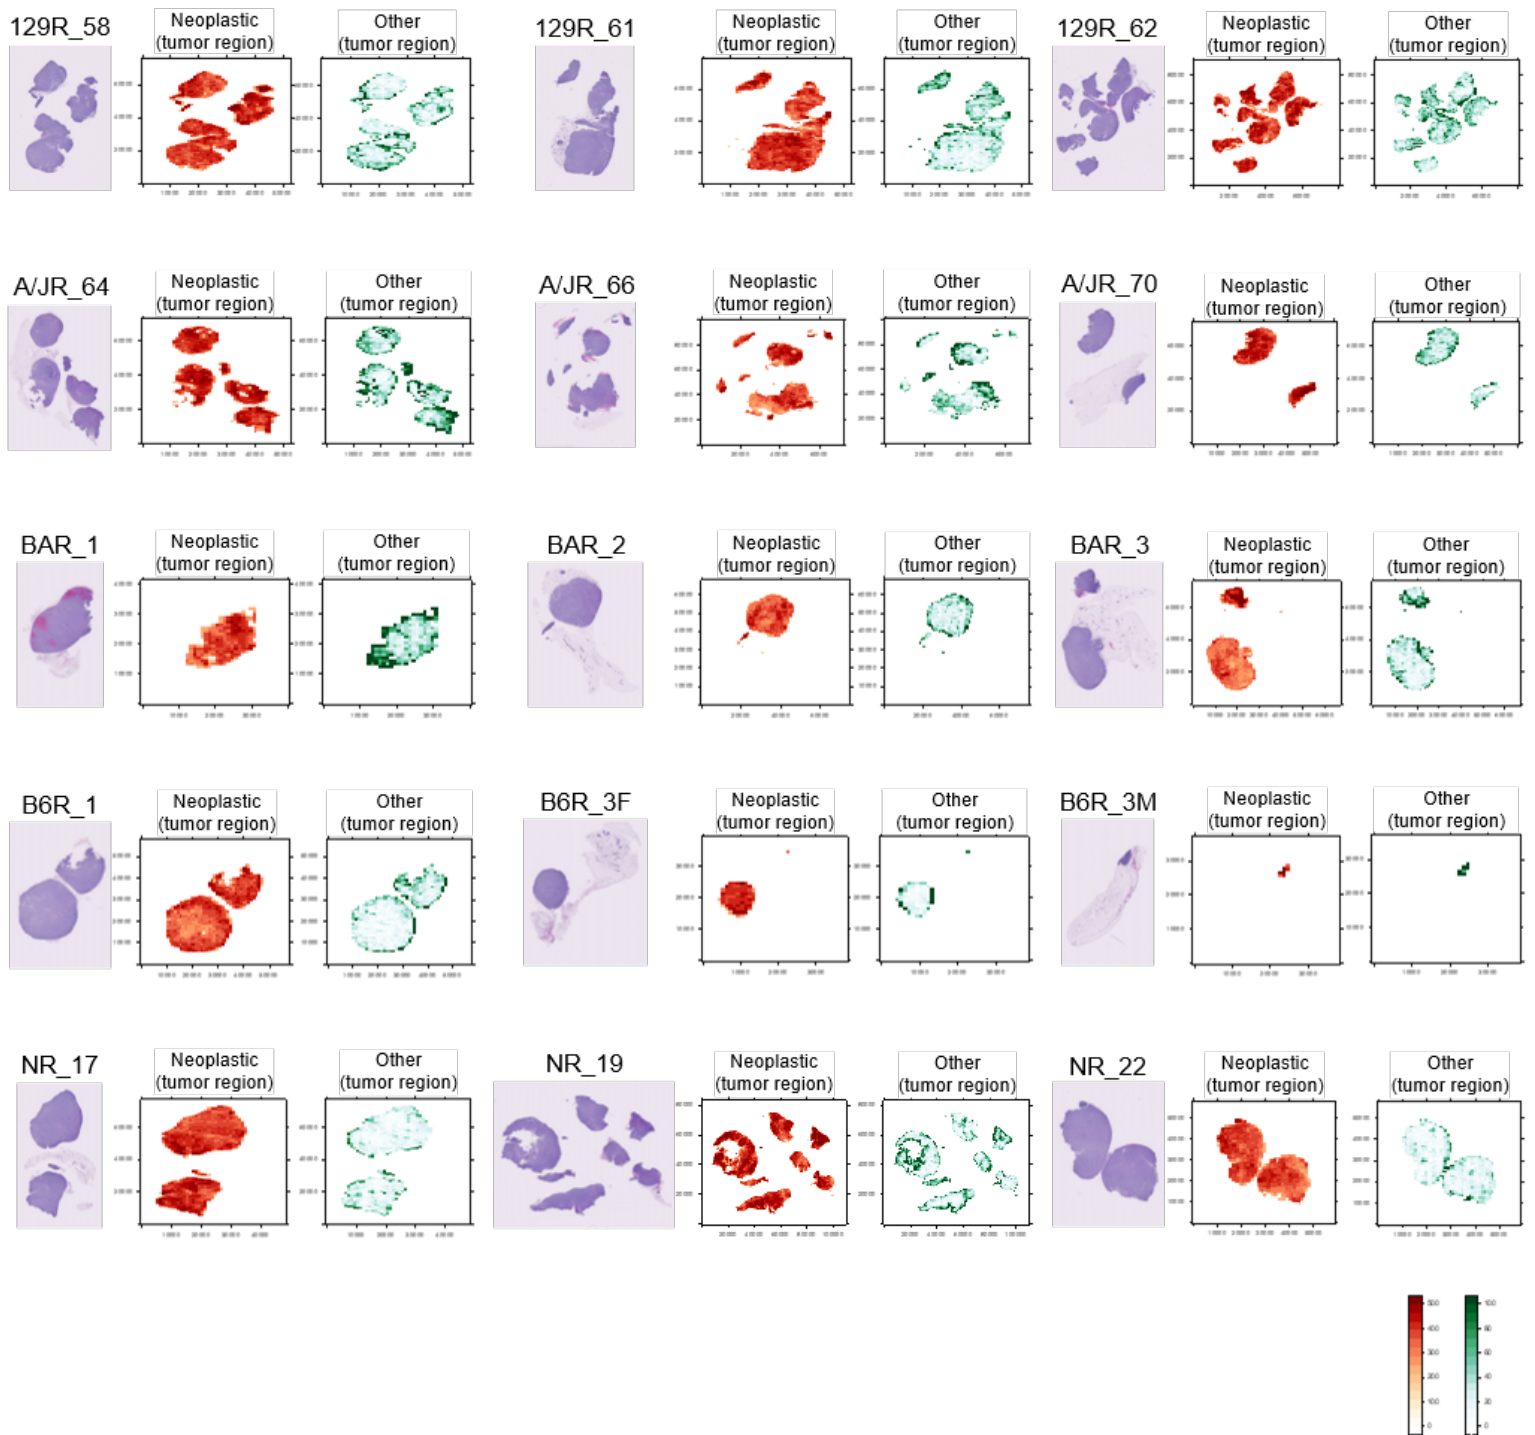

**Fig. S5. H&E image and spatial distribution of neoplastic and other nuclei types for each tumor sample of the 129R, A/JR, BAR, B6R, and NR strains.** The nuclei density is defined as the number of nuclei per 1024 pixel x 1024 pixel tile. The heatmaps show only tumor regions with >200 neoplastic nuclei per tile. The other nuclei types include connective, inflammatory, non-neoplastic epithelial, dead, and non-labeled nuclei.



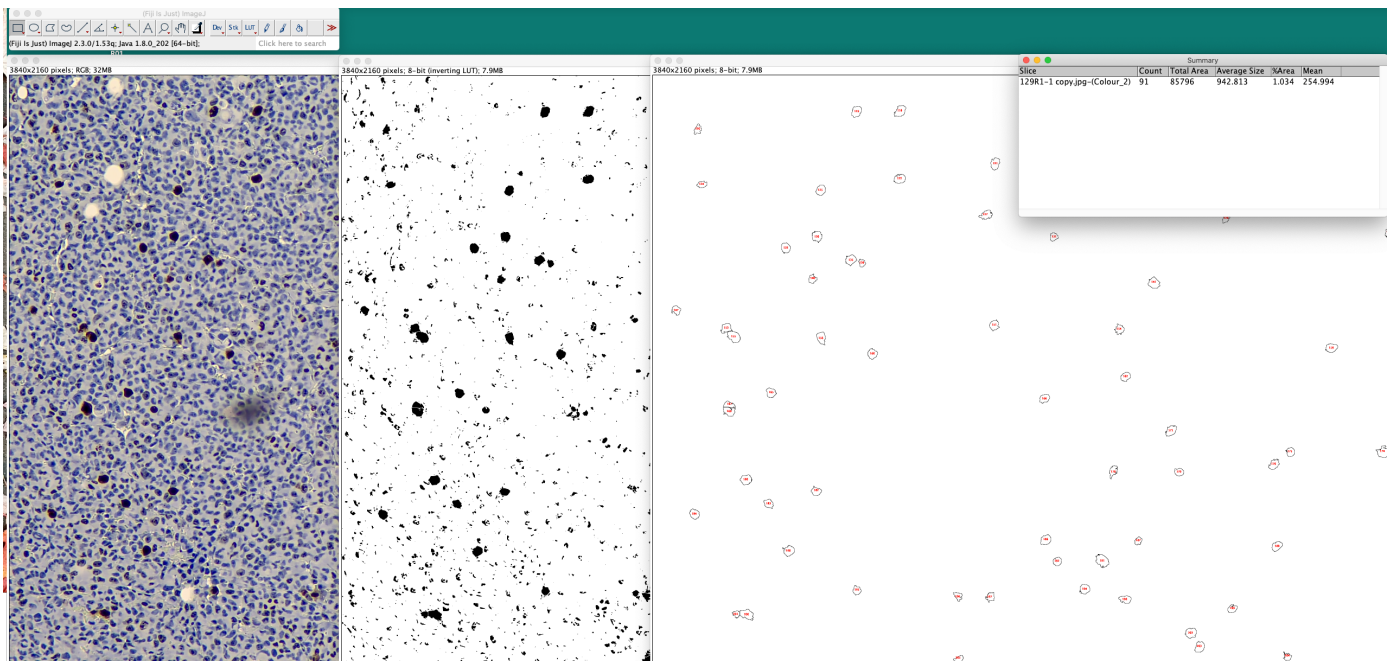

**Fig. S6. Fig. S6 Method of Ki67 counting using Fiji Software.** Slides were photographed at 40X and opened in Fiji Software. Process of analyzing IHC images based on <https://www.ncbi.nlm.nih.gov/pmc/articles/PMC6924920/> and <https://www.youtube.com/watch?v=D1qBaFwuF4E>

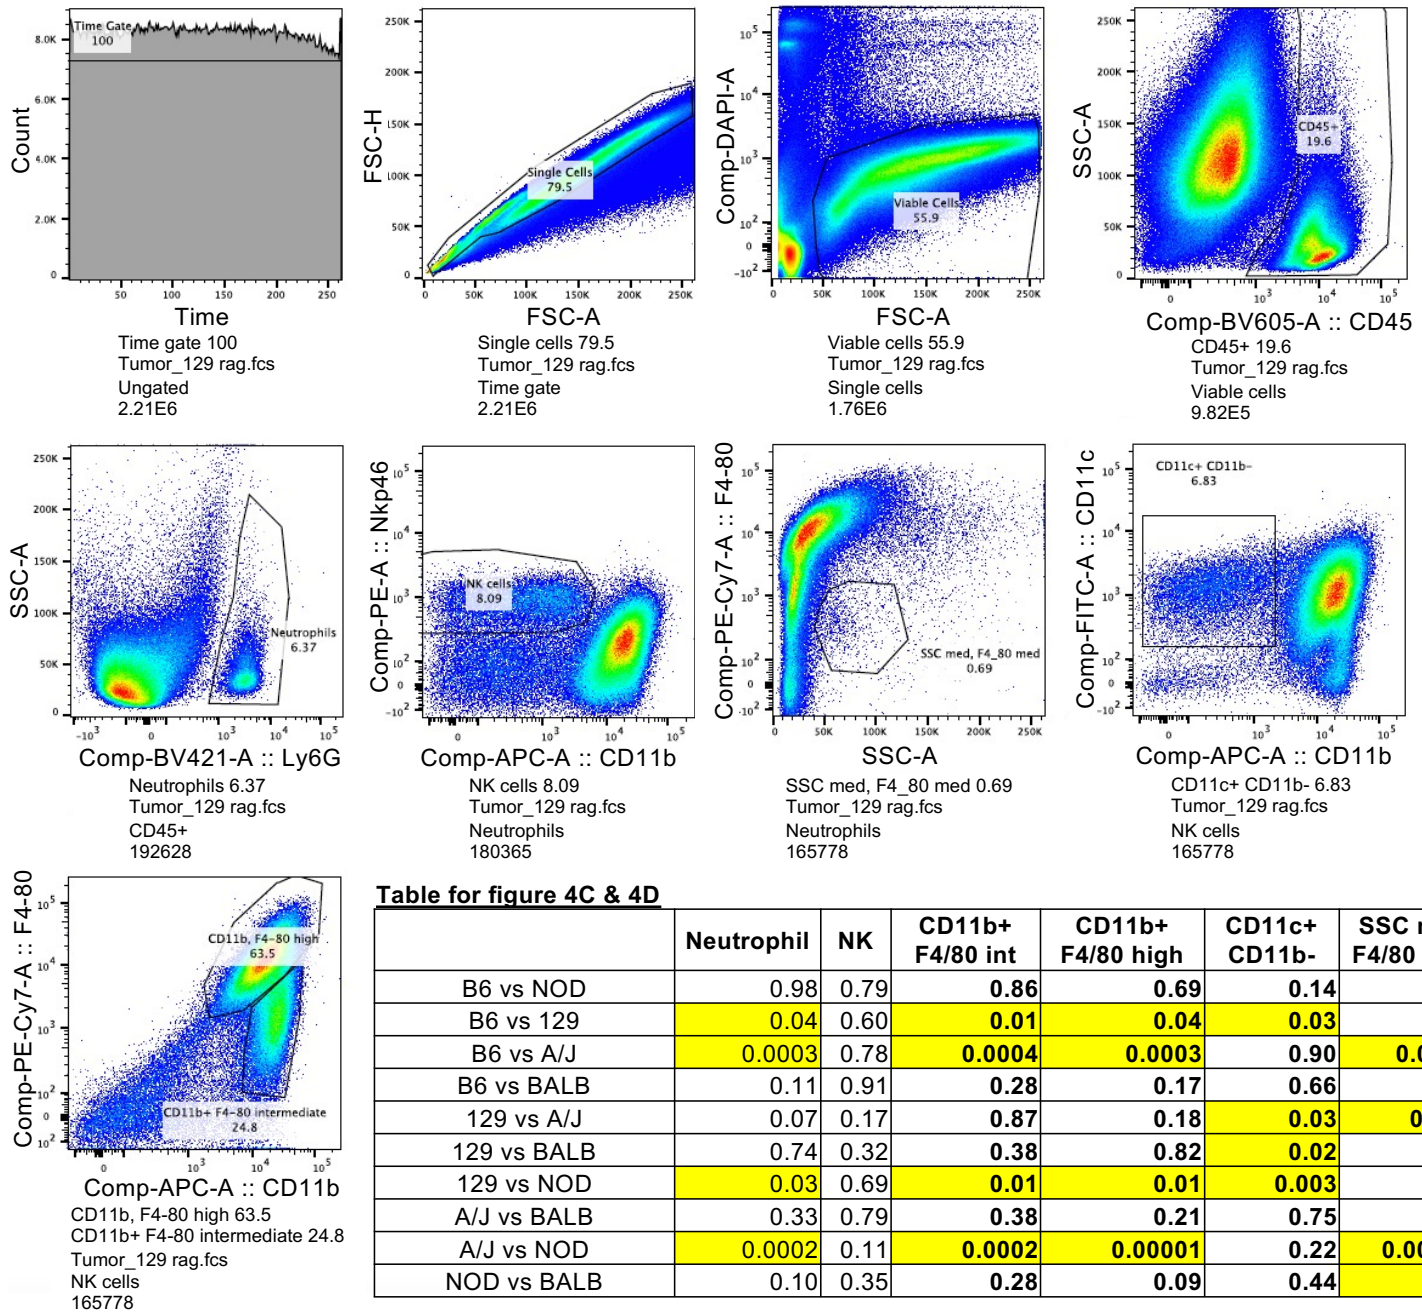

Fig. S7. Gating strategy for tumor composition and statistics for the different types of myeloid cells within the tumors of different strains. The yellow highlight shows the significant differences.



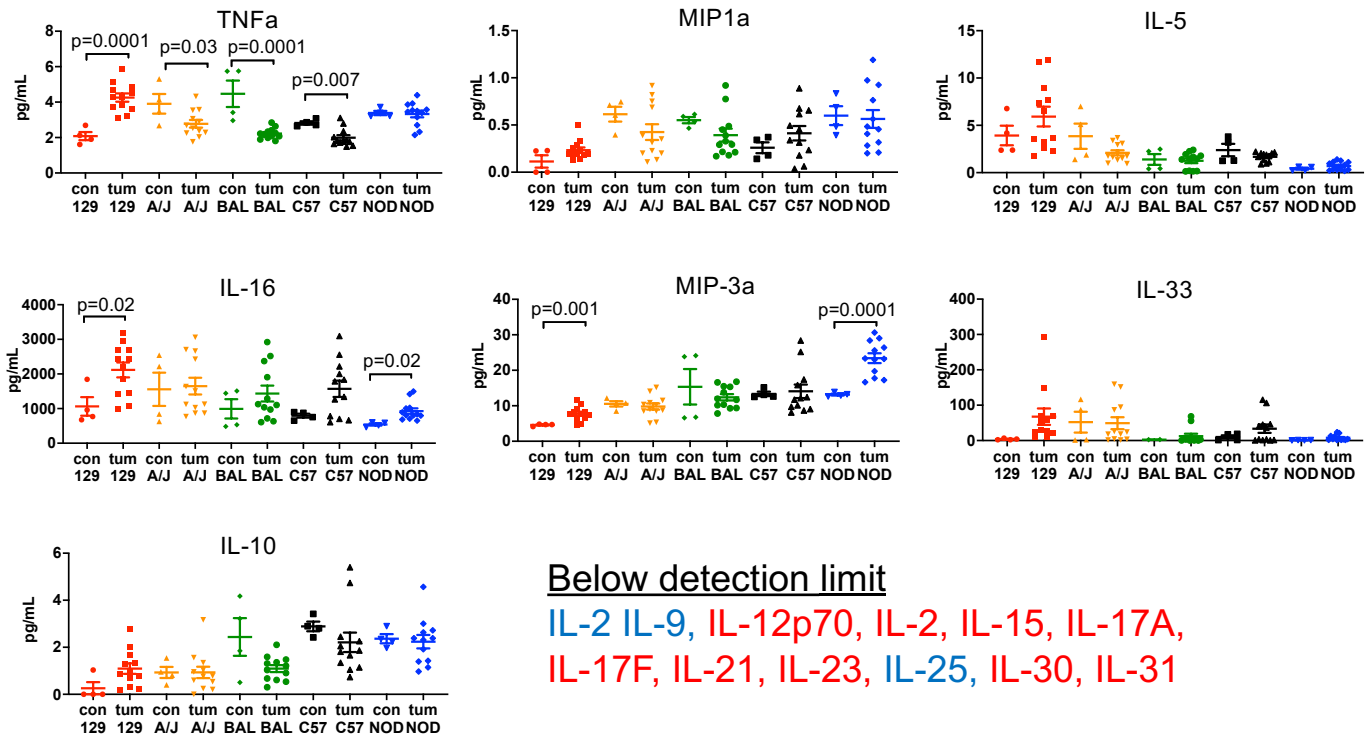

**Fig. S8. Cytokines and chemokines circulating in the plasma that did not show >2 fold changes or significant differences between xenografted versus non xenografted in any strain mice. Each dot represents a point of measurement, bars show mean. List of cytokines and chemokines that were below detection limit are listed.**

**Table S1. Fecundity of *Rag1* knockouts**

| <i>strain</i>                         | <i>number of pairs mated</i>    | <i>average mating time to pups</i>           | <i>total number of pups</i> | <i>total number of litters</i> | <i>average litter size</i> | <i>pups survived to adulthood</i> |
|---------------------------------------|---------------------------------|----------------------------------------------|-----------------------------|--------------------------------|----------------------------|-----------------------------------|
| <i>129S1/SvImJ Rag1<sup>-/-</sup></i> | 11, 6 still active, 2 new       | 31.7 days                                    | 304                         | 62                             | 4.9                        | 294                               |
| <i>A/J Rag1<sup>-/-</sup></i>         | 11, 4 still active, 2 new       | 54.9 days, some after ~21 days others months | 100                         | 27                             | 3.7                        | 94                                |
| <i>BALB/cJ Rag1<sup>-/-</sup></i>     | 13, 7 still active, 3 new       | 37.5 days                                    | 194                         | 43                             | 4.5                        | 191                               |
| <i>CAST/EiJ Rag1<sup>-/-</sup></i>    | 4, 4 active, 1 new, 1 no litter | 59.5 days, first 22 days other 97 days       | 22                          | 8                              | 2.8                        | 16                                |
| <i>C57BL/6J Rag1<sup>-/-</sup></i>    | 12, 6 still active, 2 new       | 35.6 days                                    | 342                         | 58                             | 5.9                        | 320                               |
| <i>DBA/J Rag1<sup>-/-</sup></i>       | 3, 0 active                     | 56.5 days, one never produced                | 8                           | 3                              | 1.6                        | 5                                 |
| <i>NOD/ShiLtJ Rag1<sup>-/-</sup></i>  | 14, 6 still active, 4 new       | 36.2 days                                    | 432                         | 49                             | 8.8                        | 369                               |
| <i>NZO/HiltJ Rag1<sup>-/-</sup></i>   | 9, 7 active, 1 new, 1 no litter | 34.2 days                                    | 81                          | 18                             | 4.5                        | 76                                |
| <i>PWK/PhJ Rag1<sup>-/-</sup></i>     | 1, 1 still active               | 22 days                                      | 7                           | 1                              | 7                          | 7                                 |
| <i>WSB/EiJ Rag1<sup>-/-</sup></i>     | 0                               | 0                                            | 0                           | 0                              | 0                          | 0                                 |
